# Supplementary material
Source: PubMed Central journal article supplement (PMC1329449)
Supplement: cmaj_174_2_156__1.pdf [file cmaj_174_2_156__1.pdf]

**e-Table 1: Age-adjusted changes in overweight and obesity in Canada, 1985–2003\***

| Weight class                           | Year of survey; % of respondents      |                                        |                                           |                                           |                                           |                                           |                                        |
|----------------------------------------|---------------------------------------|----------------------------------------|-------------------------------------------|-------------------------------------------|-------------------------------------------|-------------------------------------------|----------------------------------------|
|                                        | 1985<br><i>n</i> = 8 106<br>(14 965)† | 1990<br><i>n</i> = 10 456<br>(15 721)† | 1994/95<br><i>n</i> = 12 318<br>(16 896)† | 1996/97<br><i>n</i> = 50 347<br>(17 165)† | 1998/99<br><i>n</i> = 10 683<br>(17 798)† | 2000/01<br><i>n</i> = 86 174<br>(18 373)† | 2003<br><i>n</i> = 85 367<br>(18 788)† |
| Overweight<br>(BMI 25–29)              | 27.8                                  | 31.5                                   | 34.5                                      | 35.8                                      | 34.5                                      | 33.3                                      | 33.9                                   |
| Obesity<br>(BMI ≥ 30)                  | 6.1                                   | 9.6                                    | 13.6                                      | 13.0                                      | 14.9                                      | 15.3                                      | 15.7                                   |
| Class I obesity<br>(BMI 30–34.9)       | 5.1                                   | 7.9                                    | 10.4                                      | 10.2                                      | 11.2                                      | 11.3                                      | 11.5                                   |
| Class II obesity<br>(BMI 35–39.9)      | 0.8                                   | 1.4                                    | 2.2                                       | 2.1                                       | 2.9                                       | 3.0                                       | 3.0                                    |
| Class III obesity<br>(BMI ≥ 40)        | 0.3                                   | 0.4                                    | 1.0                                       | 0.7                                       | 0.8                                       | 1.0                                       | 1.3                                    |
| Class II and III<br>obesity (BMI ≥ 35) | 1.0                                   | 1.7                                    | 3.2                                       | 2.8                                       | 3.7                                       | 4.0                                       | 4.3                                    |

Note: BMI = body mass index (kg/m<sup>2</sup>).

\*Weighted prevalences were calculated from self-reported heights and weights in the 1985 and 1990 Health Promotion Surveys, the 1994/95, 1996/97 and 1998/99 National Population Health Surveys and the 2001/02 and 2003 Canadian Community Health Surveys.

†Numbers in parentheses are weighted samples (in thousands).
